# Supplementary material for: CDE-1 suppresses the production of risiRNA by coupling polyuridylation and degradation of rRNA
Source: PubMed Central journal article supplement (PMC7472701; doi:10.1186/s12915-020-00850-z), 2020-09-04
Supplement: 12915_2020_850_MOESM2_ESM.pdf [file 12915_2020_850_MOESM2_ESM.pdf]

**A**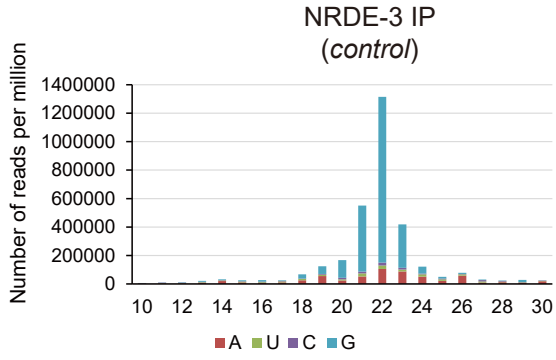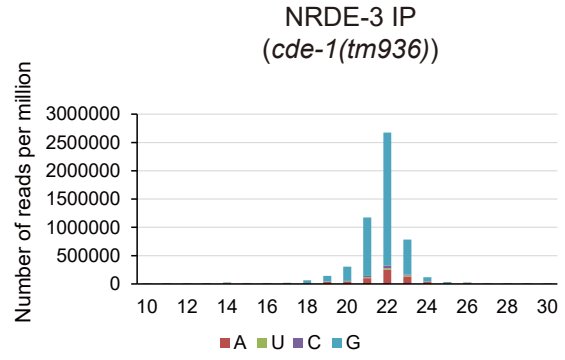**B**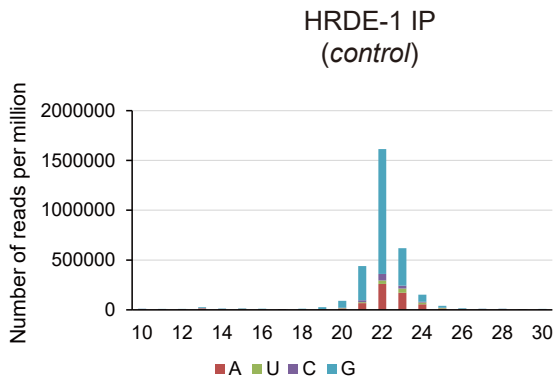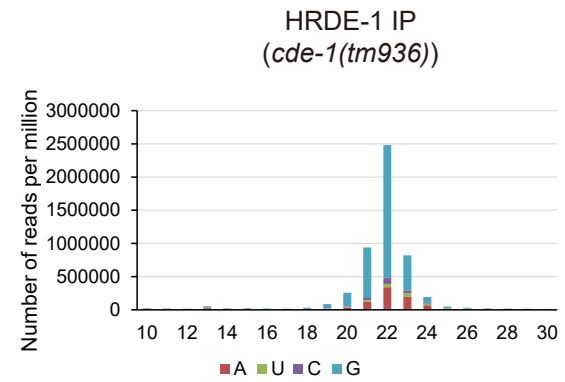**C**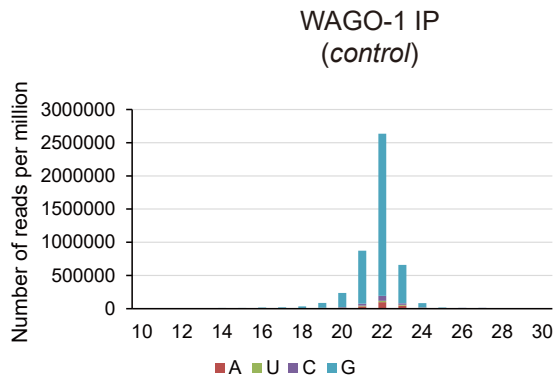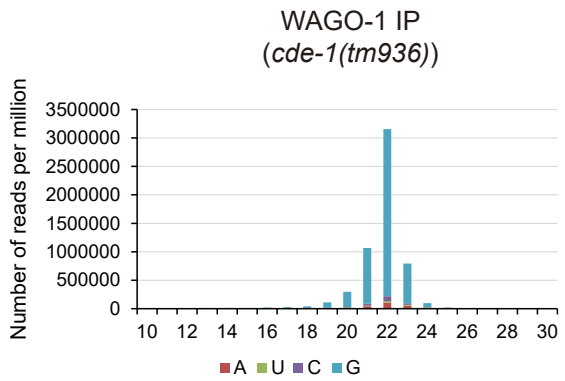**Figure S2**
